# Supplementary figures and images for: Reversible structuring of photosensitive polymer films by surface plasmon near field radiation
Source: Royal Society of Chemistry journal article supplement (doi:10.1039/c0sm01164a), 2011-01-01

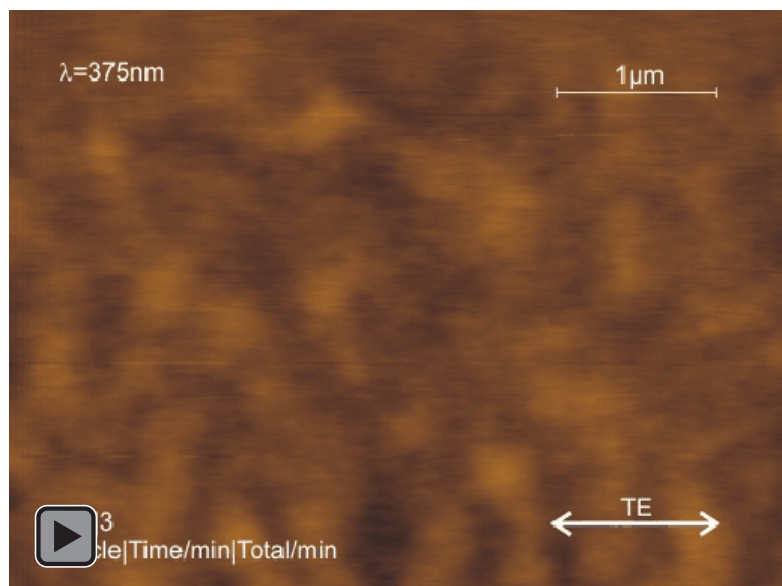

Supplement: c0sm01164as1.pdf [file c0sm01164as1.pdf]

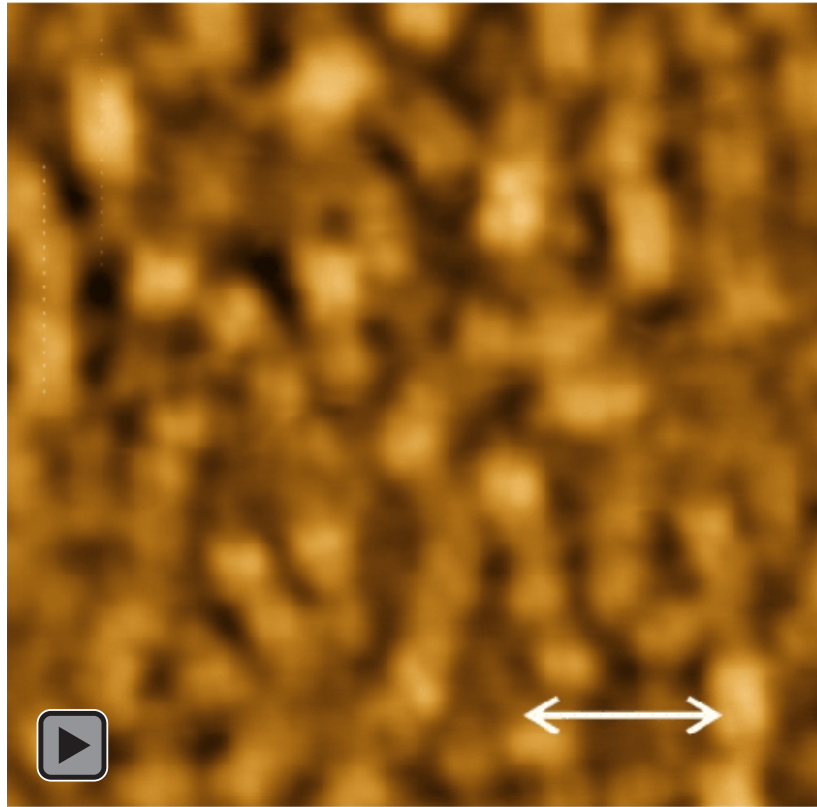

Supplement: c0sm01164as2.pdf [file c0sm01164as2.pdf]
